# Supplementary material for: Glucocorticoid Receptor Antagonist Mifepristone Does Not Alter Innate Anxiety-Like Behavior in Genetically-Selected Marchigian Sardinian (msP) Rats
Source: PubMed Central journal article supplement (PMC8003048; doi:10.3390/ijms22063095), 2021-03-18
Supplement: ijms-22-03095-s001.pdf [file ijms-22-03095-s001.pdf]

**Table S1.** Summary of all statistical analysis for the NIH test.

| Figure | Analysis    | Sex           | Dependent variable | Factors                                                   | Statistical value                                                                                                                              |
|--------|-------------|---------------|--------------------|-----------------------------------------------------------|------------------------------------------------------------------------------------------------------------------------------------------------|
| 1A     | 2-way ANOVA | Male          | Latency to eat     | Drug (vehicle vs mifepristone) × Genotype (Wistar vs msP) | Drug: $F_{(1,40)} = 0.07, p = 0.780$<br>***Genotype: $F_{(1,40)} = 42.52, p = 0.001$<br>Drug × Genotype: $F_{(1,40)} = 1.69, p = 0.201$        |
| 1B     | 2-way ANOVA | Male          | Pellet intake      | Drug (vehicle vs mifepristone) × Genotype (Wistar vs msP) | Drug: $F_{(1,40)} = 0.48, p = 0.490$<br>***Genotype: $F_{(1,40)} = 49.48, p = 0.0001$<br>Drug × Genotype: $F_{(1,40)} = 0.31, p = 0.576$       |
| 1C     | 2-way ANOVA | Female        | Latency to eat     | Drug (vehicle vs mifepristone) × Genotype (Wistar vs msP) | Drug: $F_{(1,32)} = 0.195, p = 0.662$<br>***Genotype: $F_{(1,32)} = 12.10, p = 0.001$<br>Drug × Genotype: $F_{(1,32)} = 0.28, p = 0.600$       |
| 1D     | 2-way ANOVA | Female        | Pellet intake      | Drug (vehicle vs mifepristone) × Genotype (Wistar vs msP) | Drug: $F_{(1,32)} = 0.07, p = 0.783$<br>***Genotype: $F_{(1,32)} = 16.69, p = 0.0001$<br>Drug × Genotype: $F_{(1,32)} = 1.41, p = 0.244$       |
| 1E     | 2-way ANOVA | Male x Female | Latency to eat     | Sex (male vs female) × Genotype (Wistar vs msP)           | Sex: $F_{(1,35)} = 0.27, p = 0.601$<br>Genotype: $F_{(1,35)} = 34.65, p = 0.0001$<br>Sex × Genotype: $F_{(1,35)} = 0.96, p = 0.332$            |
| 1F     | 2-way ANOVA | Male x Female | Pellet intake      | Sex (male vs female) × Genotype (Wistar vs msP)           | <sup>®</sup> Sex: $F_{(1,35)} = 4.91, p = 0.048$<br>Genotype: $F_{(1,35)} = 10.91, p = 0.002$<br>Sex × Genotype: $F_{(1,35)} = 0.01, p = 0.90$ |

Note: Significant changes are reflected as \* $p \leq 0.05$ , \*\* $p \leq 0.01$ , \*\*\* $p \leq 0.001$  or sex effects as <sup>®</sup> $p \leq 0.05$ .

**Table S2.** Summary of all statistical analysis for the CLAMS test

| Figure | Analysis    | Sex           | Dependent variable    | Factors                                                   | Statistical value                                                                                                                    |
|--------|-------------|---------------|-----------------------|-----------------------------------------------------------|--------------------------------------------------------------------------------------------------------------------------------------|
| 2A     | 2-way ANOVA | Male          | Average bout duration | Drug (vehicle vs mifepristone) × Genotype (Wistar vs msP) | Drug: $F_{(1,27)} = 3.06, p = 0.092$<br>*Genotype: $F_{(1,27)} = 4.92, p = 0.035$<br>Drug × Genotype: $F_{(1,27)} = 1.10, p = 0.303$ |
| 2B     | 2-way ANOVA | Male          | Total sleep time      | Drug (vehicle vs mifepristone) × Genotype (Wistar vs msP) | Drug: $F_{(1,27)} = 2.42, p = 0.131$<br>Genotype: $F_{(1,27)} = 0.51, p = 0.479$<br>Drug × Genotype: $F_{(1,27)} = 3.11, p = 0.089$  |
| 2C     | 2-way ANOVA | Male          | Number of sleep bouts | Drug (vehicle vs mifepristone) × Genotype (Wistar vs msP) | Drug: $F_{(1,27)} = 4.08, p = 0.053$<br>Genotype: $F_{(1,27)} = 4.13, p = 0.052$<br>Drug × Genotype: $F_{(1,27)} = 1.10, p = 0.210$  |
| 2D     | 2-way ANOVA | Female        | Average bout duration | Drug (vehicle vs mifepristone) × Genotype (Wistar vs msP) | Drug: $F_{(1,28)} = 1.21, p = 0.280$<br>Genotype: $F_{(1,28)} = 0.07, p = 0.789$<br>Drug × Genotype: $F_{(1,28)} = 2.49, p = 0.126$  |
| 2E     | 2-way ANOVA | Female        | Total sleep time      | Drug (vehicle vs mifepristone) × Genotype (Wistar vs msP) | Drug: $F_{(1,28)} = 0.38, p = 0.539$<br>Genotype: $F_{(1,28)} = 2.23, p = 0.146$<br>Drug × Genotype: $F_{(1,28)} = 9.36, p = 0.005$  |
| 2F     | 2-way ANOVA | Female        | Number of sleep bouts | Drug (vehicle vs mifepristone) × Genotype (Wistar vs msP) | Drug: $F_{(1,28)} = 0.76, p = 0.388$<br>Genotype: $F_{(1,28)} = 0.02, p = 0.872$<br>Drug × Genotype: $F_{(1,28)} = 1.58, p = 0.219$  |
| 2G     | 2-way ANOVA | Male × Female | Average bout duration | Sex (male vs female) × Genotype (Wistar vs msP)           | Sex: $F_{(1,27)} = 1.23, p = 0.276$<br>Genotype: $F_{(1,27)} = 5.70, p = 0.024$<br>Sex × Genotype: $F_{(1,27)} = 2.61, p = 0.117$    |
| 2H     | 2-way ANOVA | Male × Female | Total sleep time      | Sex (male vs female) × Genotype (Wistar vs msP)           | Sex: $F_{(1,27)} = 0.89, p = 0.354$<br>Genotype: $F_{(1,27)} = 4.24, p = 0.049$<br>Sex × Genotype: $F_{(1,27)} = 0.46, p = 0.502$    |
| 2I     | 2-way ANOVA | Male × Female | Number of sleep bouts | Sex (male vs female) × Genotype (Wistar vs msP)           | Sex: $F_{(1,27)} = 0.003, p = 0.954$<br>Genotype: $F_{(1,27)} = 4.72, p = 0.039$<br>Sex × Genotype: $F_{(1,27)} = 1.11, p = 0.300$   |

Note: Significant changes are reflected as  $*p \leq 0.05$ .

**Table S3.** Summary of statistical analysis for the acoustic startle test

| Figure | Analysis    | Sex    | Dependent variable  | Factors                                                                          | Statistical value                                                                                                                                                                                                          |
|--------|-------------|--------|---------------------|----------------------------------------------------------------------------------|----------------------------------------------------------------------------------------------------------------------------------------------------------------------------------------------------------------------------|
| 3A     | 2-way ANOVA | Male   | 120 dB T1           | Drug (vehicle vs mifepristone) × Genotype (Wistar vs msP)                        | Drug: $F_{(1,26)} = 1.60, p = 0.217$<br>Genotype: $F_{(1,26)} = 0.84, p = 0.366$<br>Drug × Genotype: $F_{(1,26)} = 0.68, p = 0.414$                                                                                        |
| 3B     | 2-way ANOVA | Male   | 120 dB T2-6         | Drug (vehicle vs mifepristone) × Genotype (Wistar vs msP)                        | Drug: $F_{(1,26)} = 0.55, p = 0.463$<br>**Genotype: $F_{(1,26)} = 10.56, p = 0.003$<br>Drug × Genotype: $F_{(1,26)} = 0.98, p = 0.330$                                                                                     |
| 3C     | 2-way ANOVA | Male   | 120 dB final block  | Drug (vehicle vs mifepristone) × Genotype (Wistar vs msP)                        | Drug: $F_{(1,26)} = 0.10, p = 0.751$<br>***Genotype: $F_{(1,26)} = 14.51, p = 0.001$<br>Drug × Genotype: $F_{(1,26)} = 0.66, p = 0.424$                                                                                    |
| 3D     | 2-way ANOVA | Male   | Prepulse inhibition | Drug (vehicle vs mifepristone) × Genotype (Wistar vs msP)                        | Drug: $F_{(1,26)} = 1.19, p = 0.284$<br>**Genotype: $F_{(1,26)} = 9.32, p = 0.005$<br>Drug × Genotype: $F_{(1,26)} = 1.24, p = 0.274$                                                                                      |
| 3E     | 3-way ANOVA | Male   | 80-105 dB           | Drug (vehicle vs mifepristone) × Genotype (Wistar vs msP) × Intensity (80-105db) | Intensity: $F_{(5,130)} = 70.82, p = 0.0001$<br>Drug × Intensity: $F_{(5,130)} = 1.08, p = 0.373$<br>Genotype × Intensity: $F_{(5,130)} = 9.25, p = 0.001$<br>Drug × Genotype × Intensity: $F_{(5,130)} = 0.57, p = 0.720$ |
| 3F     | 2-way ANOVA | Female | 120 dB T1           | Drug (vehicle vs mifepristone) × Genotype (Wistar vs msP)                        | Drug: $F_{(1,28)} = 2.15, p = 0.153$<br>**Genotype: $F_{(1,28)} = 8.89, p = 0.006$<br>Drug × Genotype: $F_{(1,28)} = 0.23, p = 0.630$                                                                                      |
| 3G     | 2-way ANOVA | Female | 120 dB T2-6         | Drug (vehicle vs mifepristone) × Genotype (Wistar vs msP)                        | Drug: $F_{(1,28)} = 1.43, p = 0.241$<br>Genotype: $F_{(1,28)} = 4.13, p = 0.052$<br>Drug × Genotype: $F_{(1,28)} = 2.26, p = 0.143$                                                                                        |
| 3H     | 2-way ANOVA | Female | 120 dB final block  | Drug (vehicle vs mifepristone) × Genotype (Wistar vs msP)                        | Drug: $F_{(1,28)} = 0.54, p = 0.466$<br>*Genotype: $F_{(1,28)} = 5.37, p = 0.028$<br>Drug × Genotype: $F_{(1,28)} = 1.20, p = 0.282$                                                                                       |
| 3I     | 2-way ANOVA | Female | Prepulse inhibition | Drug (vehicle vs mifepristone) × Genotype (Wistar vs msP)                        | Drug: $F_{(1,28)} = 0.75, p = 0.392$<br>*Genotype: $F_{(1,28)} = 7.14, p = 0.012$<br>Drug × Genotype: $F_{(1,28)} = 0.64, p = 0.428$                                                                                       |
| 3J     | 3-way ANOVA | Female | 80-105 dB           | Drug (vehicle vs mifepristone) × Genotype (Wistar vs msP) × Intensity (80-105db) | Intensity: $F_{(5,140)} = 34.60, p = 0.0001$<br>Drug × Intensity: $F_{(5,140)} = 0.58, p = 0.711$<br>Genotype × Intensity: $F_{(5,140)} = 4.88, p = 0.026$<br>Drug × Genotype × Intensity: $F_{(5,140)} = 1.72, p = 0.198$ |

Note: Significant changes are reflected as \* $p \leq 0.05$ , \*\* $p \leq 0.01$ , \*\*\* $p \leq 0.001$ .

**Table S4.** Summary of statistical analysis for sex differences for the acoustic startle test

| Figure | Analysis    | Sex           | Dependent variable  | Factors                                            | Statistical value                                                                                                                                                                                                                                                     |
|--------|-------------|---------------|---------------------|----------------------------------------------------|-----------------------------------------------------------------------------------------------------------------------------------------------------------------------------------------------------------------------------------------------------------------------|
| 3K     | 2-way ANOVA | Male x Female | 120 dB T1           | Sex (male vs female) ×<br>Genotype (Wistar vs msP) | Sex: $F_{(1,26)} = 12.08, p = 0.002$<br>Genotype: $F_{(1,26)} = 6.09, p = 0.020$<br>Sex × Genotype: $F_{(1,26)} = 4.81, p = 0.037$                                                                                                                                    |
| 3L     | 2-way ANOVA | Male x Female | 120 dB T2-6         | Sex (male vs female) ×<br>Genotype (Wistar vs msP) | @@@Sex: $F_{(1,26)} = 18.14, p = 0.0001$<br>Genotype: $F_{(1,26)} = 2.15, p = 0.154$<br>Sex × Genotype: $F_{(1,26)} = 0.09, p = 0.761$                                                                                                                                |
| 3M     | 2-way ANOVA | Male x Female | 120 dB final block  | Sex (male vs female) ×<br>Genotype (Wistar vs msP) | @@@Sex: $F_{(1,26)} = 18.20, p = 0.0001$<br>Genotype: $F_{(1,26)} = 11.15, p = 0.003$<br>Sex × Genotype: $F_{(1,26)} = 1.30, p = 0.264$                                                                                                                               |
| 3N     | 2-way ANOVA | Male x Female | Prepulse inhibition | Sex (male vs female) ×<br>Genotype (Wistar vs msP) | @Sex: $F_{(1,26)} = 5.61, p = 0.025$<br>Genotype: $F_{(1,26)} = 8.79, p = 0.006$<br>Sex × Genotype: $F_{(1,26)} = 0.02, p = 0.889$                                                                                                                                    |
| 3O     | 3-way ANOVA | Male x Female | 80-105 dB           | Sex (male vs female) ×<br>Genotype (Wistar vs msP) | @@@Sex: $F_{(1,26)} = 20.02, p = 0.0001$<br>Intensity: $F_{(5,130)} = 53.99, p = 0.001$<br>Sex × Intensity: $F_{(5,130)} = 12.66, p = 0.0001$<br>Genotype × Intensity: $F_{(5,130)} = 3.36, p = 0.007$<br>Sex × Genotype × Intensity: $F_{(5,130)} = 0.51, p = 0.767$ |

Note: Significant changes are reflected as @ $p \leq 0.05$ , @@ $p \leq 0.01$ , @@@ $p \leq 0.001$ .
